# Supplementary material for: Leukemia-specific delivery of mutant NOTCH1 targeted therapy
Source: PubMed Central journal article supplement — J Exp Med. 2018 Jan 2;215(1):197–216. doi: 10.1084/jem.20151778 (PMC5748843; doi:10.1084/jem.20151778), 2018-01-02
Supplement: JEM_20151778_sm.pdf [file JEM_20151778_sm.pdf]

SUPPLEMENTAL MATERIAL

Roti et al., <https://doi.org/10.1084/jem.20151778>

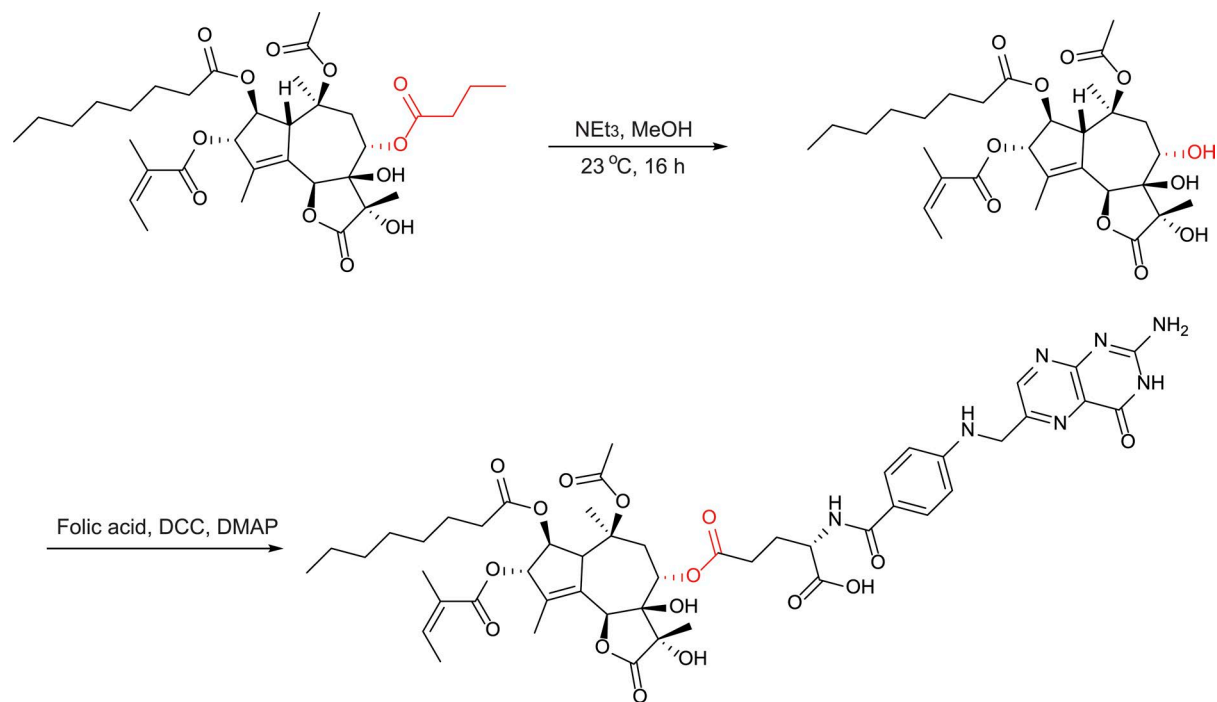

Figure S1. **Synthesis of JQ-FT.** Schematic representation of JQ-FT synthesis.

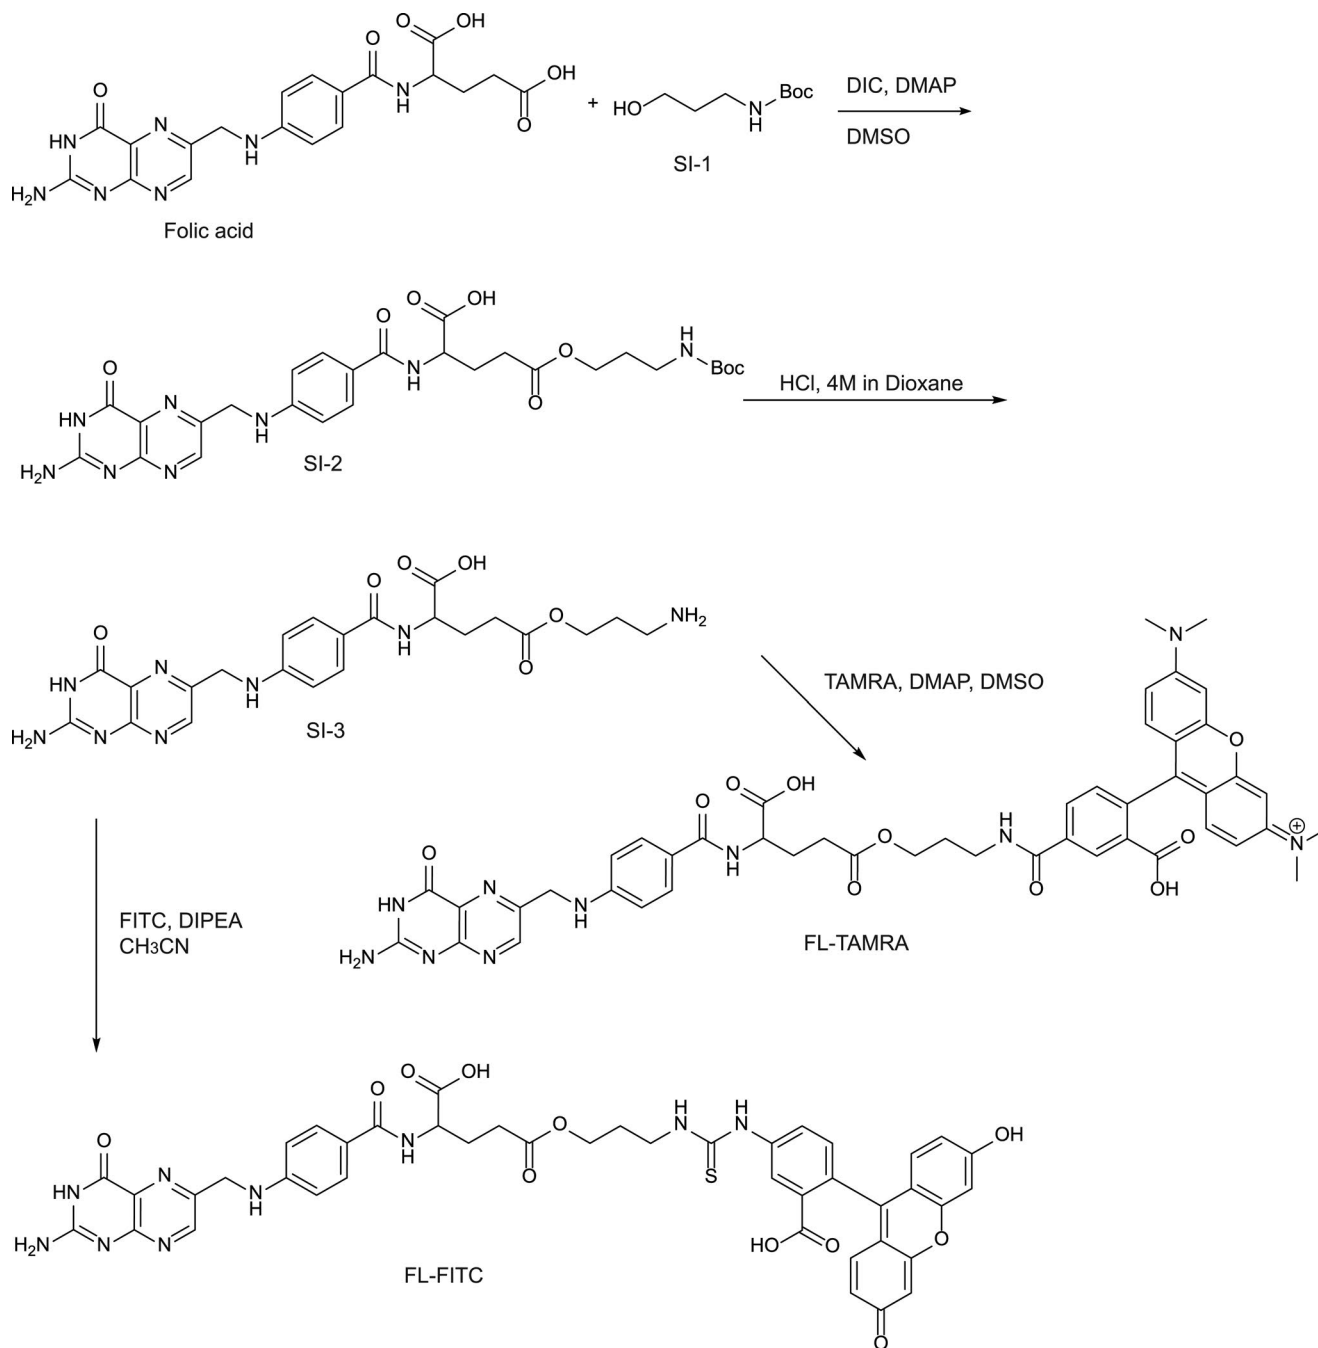

Figure S2. **Synthesis of fluorescence FA derivatives.** Schematic representation of FL-FITC and FL-TAMRA synthesis.

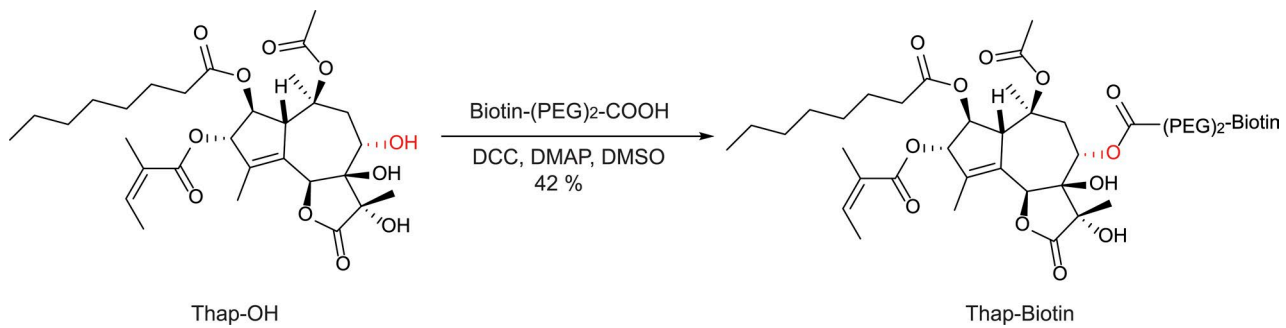

Figure S3. **Synthesis of biotinylated thapsigargin.** Schematic representation of Thap-biotin synthesis.

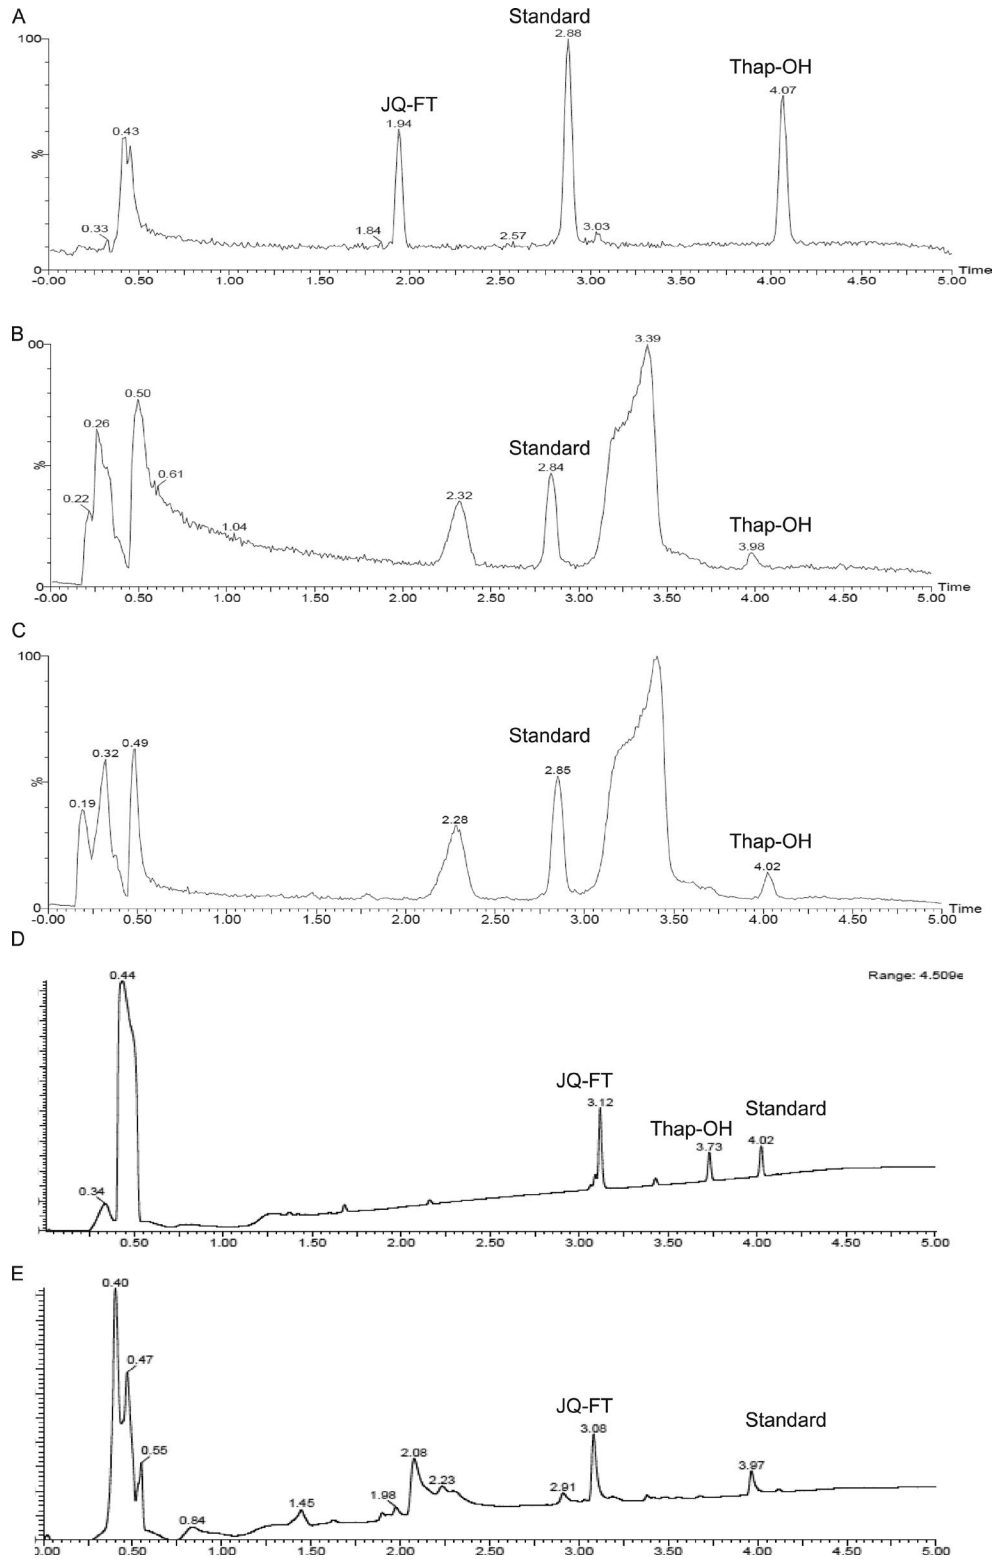

Figure S4. **JQ-FT LC-MS traces.** (A) LC-MS control traces of JQ-FT, Thap-OH, and an internal standard reference eluted in cell lysis buffer. (B) LC-MS analysis of protein lysates of cells (ALL/SIL) treated with 20 μM JQ-FT. (C) LC-MS analysis of protein lysates of cells (ALL/SIL) treated with 20 μM Thap-OH. (D) LC-MS control traces of JQ-FT, Thap-OH, and an internal standard reference eluted in RPMI medium. (E) LC-MS analysis of cell culture media of cell (ALL/SIL) treated with 20 μM Thap-OH.
